# Supplementary material for: Cryo-electron microscopy structure of a coronavirus spike glycoprotein trimer
Source: Springer Nature journal article supplement (doi:10.1038/nature16988), 2016-02-05
Supplement: 41586_2016_BFnature16988_MOESM294_ESM.pdf [file 41586_2016_BFnature16988_MOESM294_ESM.pdf]

**Supplementary Table 1: List of asparagine residues for which N-linked glycans are visible in the cryoEM density.**

| Residue Number |
|----------------|
| 31             |
| 60             |
| 192            |
| 357            |
| 625            |
| 657            |
| 665            |
| 893            |

**Supplementary Table 2: List of cysteine residues involved in the formation of disulfide bonds.**

| Disulfide bond number | Residues  |
|-----------------------|-----------|
| 1                     | 21-158    |
| 2                     | 153-187   |
| 3                     | 165-246   |
| 4                     | 284-294   |
| 5                     | 329-354   |
| 6                     | 372-425   |
| 7                     | 384-564   |
| 8                     | 541-547   |
| 9                     | 580-633   |
| 10                    | 658-682   |
| 11                    | 697-706   |
| 12                    | 775-797   |
| 13                    | 780-786   |
| 14                    | 894-905   |
| 15                    | 1082-1093 |

**Supplementary Table 3: List of residues mediating hydrogen bond and salt bridge interactions between S<sub>1</sub> and S<sub>2</sub> subunits.**

| Residue/Chain | Residue/Chain |
|---------------|---------------|
| Y634/A        | D774/C        |
| C633/A        | D782/C        |
| K265/A        | Q788/C        |
| R631/A        | T895/C        |
| G704/A        | V918/C        |
| N559/A        | E1029/C       |
| D376/A        | R1033/C       |
| N374/A        | R1033/C       |
| T589/A        | Q1028/C       |
| N655/A        | N892/C        |
| K417/A        | E1035/B       |
